# Supplementary material for: Inflammatory pre-conditioning restricts the seeded induction of α-synuclein pathology in wild type mice
Source: PubMed Central journal article supplement (PMC5210310; doi:10.1186/s13024-016-0142-z), 2017-01-03
Supplement: 13024_2016_142_MOESM1_ESM.pdf [file 13024_2016_142_MOESM1_ESM.pdf]

Naive

IL-6

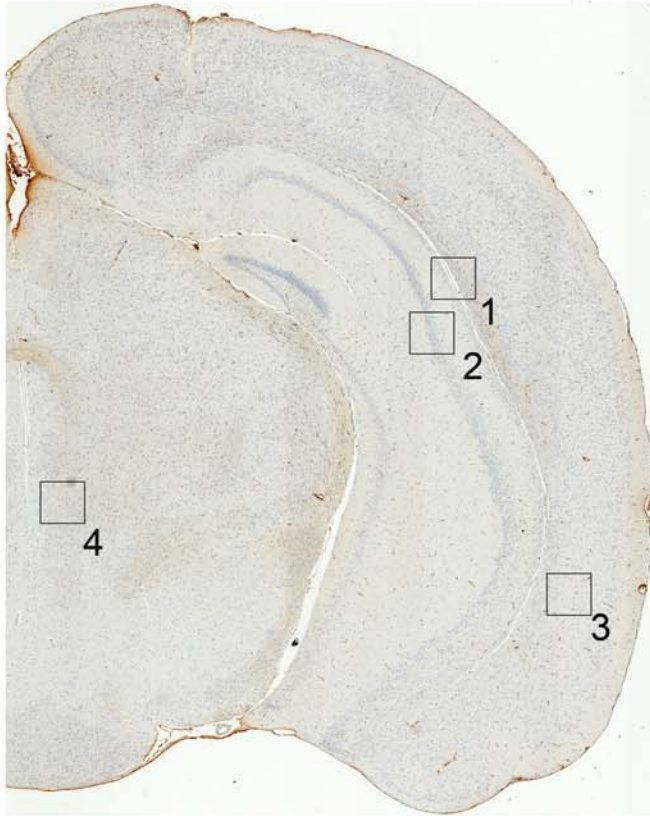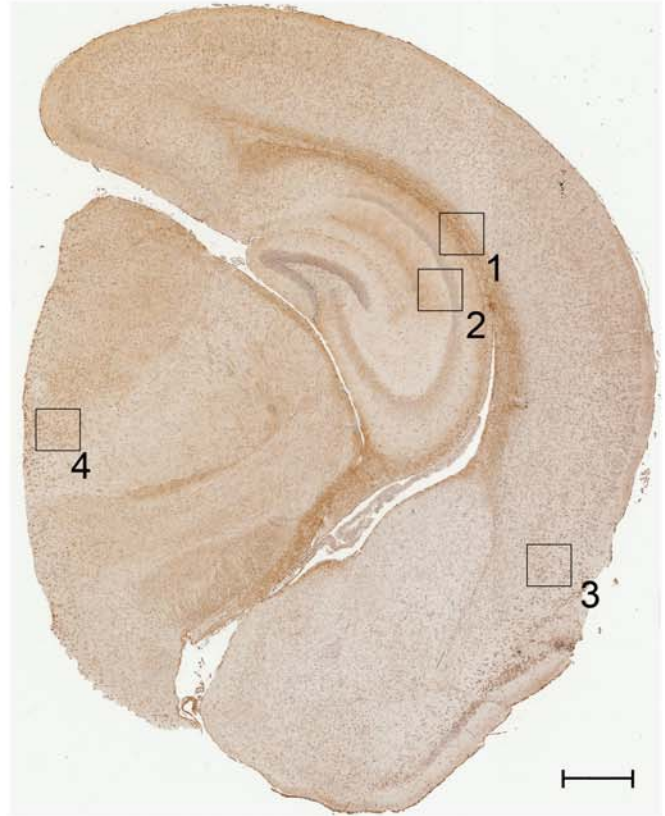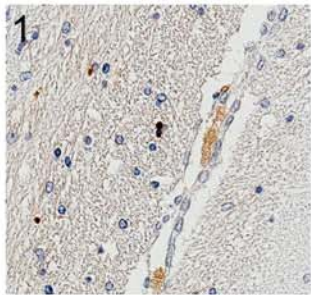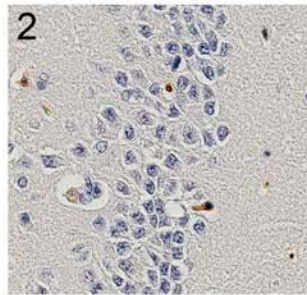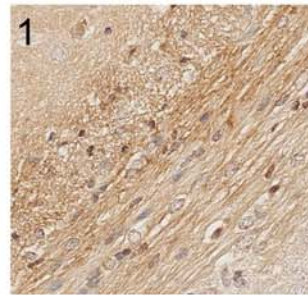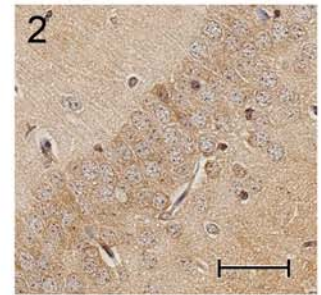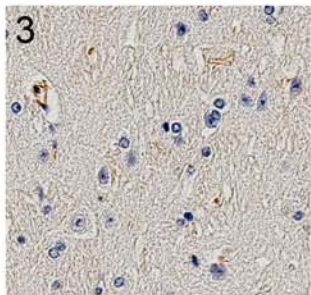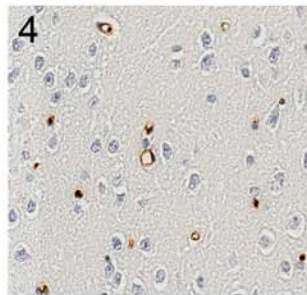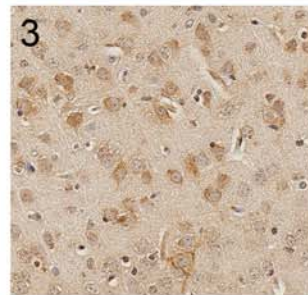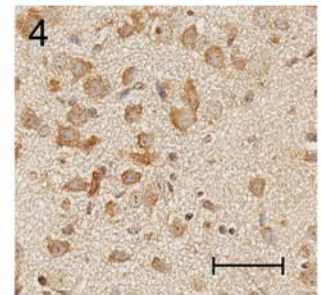

Figure S1
